# Supplementary material for: Viable approach toward efficient p-type conductivity in Al-doped anatase TiO2via strain engineering
Source: Royal Society of Chemistry journal article supplement (doi:10.1039/c6ra28878b), 2017-01-01
Supplement: c6ra28878b1.pdf [file c6ra28878b1.pdf]

# **Viable approach toward efficient *p*-type conductivity in Al-doped anatase TiO<sub>2</sub> via strain engineering**

Wei Zhou <sup>a, b</sup> and Naoto Umezawa <sup>b †</sup>

<sup>a</sup>Department of Applied Physics, Tianjin Key Laboratory of Low Dimensional Materials Physics and Preparing Technology, Faculty of Science, Tianjin University, Tianjin 300072, P. R. China

<sup>b</sup> International Center for Materials Nanoarchitectonics (MANA), National Institute for Materials Science, 1-1, Namiki, Tsukuba, Ibaraki 305-0044, Japan

†UMEZAWA.Naoto@nims.go.jp

The Al doping do not significantly modify the band edge electronic structures because of much lower content of Al  $sp$  states than that of Ti  $3d$  states as shown in Fig. S1. Thus, we ignored their contributions to the band edge character in our discussions.

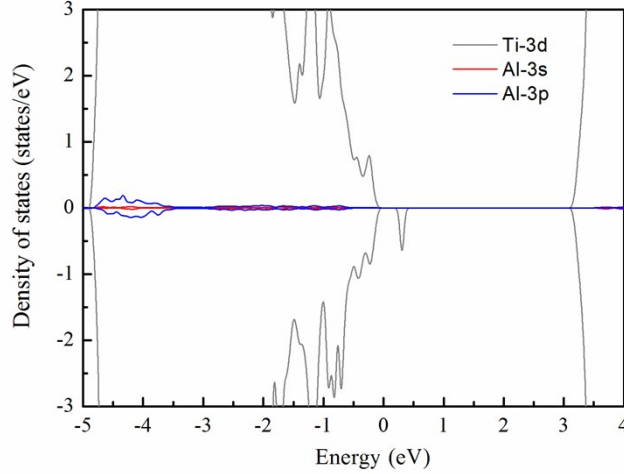

Fig. S1 Density of states for Ti- $3d$ , Al - $3s$  and - $3p$  orbitals in Al doped  $\text{TiO}_2$ .

The density of states for Al- $3s$ ,  $3p$  orbitals from LDA+U ( $U=0$  for Al orbitals) and HSE06 calculations are shown in the Fig. S2 below. It can be seen that the top of valence band, which is our focus and plays key role in this work, are similar for both calculation results. Besides, the contribution of Al states is much smaller than that of Ti- $3d$  states in the top of the valence band. Therefore, the standard LDA functional chosen for Al  $3s$  and  $3p$  electrons is reasonable and acceptable.

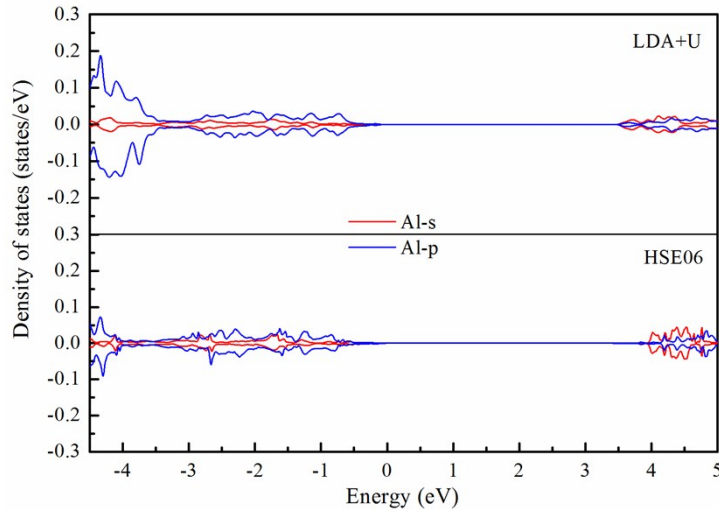

Fig. S2 Density of states for Al- $3s$  and - $3p$  orbitals in Al doped  $\text{TiO}_2$  from LDA+U and HSE06 functional calculations, respectively.
